# Supplementary material for: Combined MEK and ERK inhibition overcomes therapy-mediated pathway reactivation in RAS mutant tumors
Source: PubMed Central journal article supplement (PMC5628883; doi:10.1371/journal.pone.0185862), 2017-10-05
Supplement: pone.0185862.s001.pdf [file pone.0185862.s001.pdf]

## Mathematical modeling methods

Biochemical reactions and associated parameters related to signal transduction were taken from prior publications ([41] and [42]), and initial concentrations of protein species were taken as median values from quantitative mass spectrometry measurements across a panel of cancer cell lines (Shi et al., 2016). The *KRAS*<sup>G12V</sup> mutation was implemented via 10-fold reduced binding rate of the active (GTP) form to RAS-GAP. The core model contains 101 reactions and 75 parameters, including the canonical enzymatic cascade (48 parameters) with multiple feedback regulatory loops (27 parameters). An additional 59 reactions related to drug-target interactions were included, and 14 drug-specific parameters were fixed to experimentally measured values. Parameters related to feedback regulatory loops were estimated by fitting *in vitro* phospho-MEK and phospho-ERK dose responses to cobimetinib and GDC-0623 treatments [22] via particle swarm optimization. An empirical relationship was used to transform relative steady state ppERK to cell viability ( $1 - e^{-4 \cdot (\text{relative ppERK})}$ ). The model was simulated for 24-hours (to quasi-steady state), followed by drug treatments for 72 hours. The model was coded in SimBiology® and simulated using MATLAB R2016a. Model equations, parameters values, and initial conditions are specified in Supplemental Table 1.

## References

- Hatzivassiliou, G., J.R. Haling, H. Chen, K. Song, S. Price, R. Heald, J.F.M. Hewitt, M. Zak, A. Peck, C. Orr, M. Merchant, K.P. Hoefflich, J. Chan, S.-M. Luoh, D.J. Anderson, M.J.C. Ludlam, C. Wiesmann, M. Ultsch, L.S. Friedman, S. Malek, and M. Belvin. 2013. Mechanism of MEK inhibition determines efficacy in mutant KRAS- versus BRAF-driven cancers. *Nature*. 501:232–6. doi:10.1038/nature12441.
- Schoeberl, B., C. Eichler-Jonsson, E.D. Gilles, and G. Müller. 2002. Computational modeling of the dynamics of the MAP kinase cascade activated by surface and internalized EGF receptors. *Nat. Biotechnol.* 20:370–375. doi:10.1038/nbt0402-370.
- Shi, T., M. Niepel, J.E. McDermott, Y. Gao, C.D. Nicora, W.B. Chrisler, L.M. Markillie, V.A. Petyuk, R.D. Smith, K.D. Rodland, P.K. Sorger, W.-J. Qian, and H.S. Wiley. 2016. Conservation of protein abundance patterns reveals the regulatory architecture of the EGFR-MAPK pathway. *Sci. Signal.* 9:1–14.
- Sturm, O.E., R. Orton, J. Grindlay, M. Birtwistle, V. Vyshemirsky, D. Gilbert, M.

Calder, A. Pitt, B. Kholodenko, and W. Kolch. 2010. The mammalian MAPK/ERK pathway exhibits properties of a negative feedback amplifier. *Sci. Signal.* 3:ra90. doi:10.1126/scisignal.2001212.

**Supplemental Table 1. Mathematical modeling of the MAPK pathway**

| <b>Parameter</b> | <b>Value</b> | <b>Units</b>         |
|------------------|--------------|----------------------|
| k1f              | 2.49087E-05  | cell/molecule/second |
| k1r              | 1.3          | 1/second             |
| k2               | 0.5          | 1/second             |
| k3f              | 0.0000131    | cell/molecule/second |
| k3r              | 0.3          | 1/second             |
| k4               | 0.023        | 1/second             |
| k5f              | 1.6667E-08   | cell/molecule/second |
| k5r              | 0.0053       | 1/second             |
| k6f              | 1.6667E-06   | cell/molecule/second |
| k6r              | 0.0053       | 1/second             |
| k7               | 1            | 1/second             |
| k8f              | 0.000118333  | cell/molecule/second |
| k8r              | 0.2          | 1/second             |
| k9               | 1            | 1/second             |
| k10f             | 0.000118333  | cell/molecule/second |
| k10r             | 0.2          | 1/second             |
| k11              | 1            | 1/second             |
| k14              | 3.5          | 1/second             |
| k15f             | 0.00000045   | cell/molecule/second |
| k15r             | 0.5          | 1/second             |
| k16              | 0.058        | 1/second             |
| k19              | 2.9          | 1/second             |
| k20f             | 2.38333E-05  | cell/molecule/second |
| k20r             | 0.8          | 1/second             |
| k21              | 0.058        | 1/second             |
| k22f             | 8.90722E-05  | cell/molecule/second |
| k22r             | 0.033        | 1/second             |
| k23              | 16           | 1/second             |
| k24f             | 8.33333E-06  | cell/molecule/second |
| k24r             | 0.5          | 1/second             |
| k25              | 0.246        | 1/second             |
| k26f             | 8.90722E-05  | cell/molecule/second |
| k26r             | 0.033        | 1/second             |
| k27              | 5.7          | 1/second             |
| k28f             | 0.0000235    | cell/molecule/second |
| k28r             | 0.6          | 1/second             |
| k29              | 0.246        | 1/second             |
| k30f             | 0.000000001  | cell/molecule/second |
| k30r             | 99.20374868  | 1/second             |

|       |             |                      |
|-------|-------------|----------------------|
| k31   | 998.7677413 | 1/second             |
| k32f  | 0.003270023 | cell/molecule/second |
| k32r  | 2.339375737 | 1/second             |
| k33   | 29.97830381 | 1/second             |
| k34f  | 0.0000099   | cell/molecule/second |
| k34r  | 1.249296869 | 1/second             |
| k35   | 995.6270947 | 1/second             |
| k36   | 49.98376987 | 1/second             |
| k37f  | 0.000000954 | cell/molecule/second |
| k37r  | 45.26487127 | 1/second             |
| k38   | 20.0666884  | 1/second             |
| k39f  | 0.0000005   | cell/molecule/second |
| k39r  | 11.05212178 | 1/second             |
| k40   | 0.005       | 1/second             |
| k44   | 0.00001     | 1/second             |
| k45   | 0.001       | 1/second             |
| k46   | 0.029595942 | 1/second             |
| k47   | 0.001072136 | 1/second             |
| k48f  | 0.00000211  | cell/molecule/second |
| k48r  | 65.75095587 | 1/second             |
| k49f  | 0.00000244  | cell/molecule/second |
| k49r  | 49.92687244 | 1/second             |
| k50   | 0           | 1/second             |
| k51f  | 1.31186E-06 | cell/molecule/second |
| k51r  | 0.3         | 1/second             |
| k43   | 0.002       | 1/second             |
| k42   | 0.098260953 | 1/second             |
| k41   | 0.005607279 | 1/second             |
| k401f | 3.73E-07    | cell/molecule/second |
| k401r | 0.0042      | 1/second             |
| k402f | 4.36E-07    | cell/molecule/second |
| k402r | 0.0042      | 1/second             |
| k13f  | 7.02424E-07 | cell/molecule/second |
| k13r  | 0.0162      | 1/second             |
| k12f  | 4.0352E-07  | cell/molecule/second |
| k12r  | 0.0134      | 1/second             |
| k18f  | 7.02424E-07 | cell/molecule/second |
| k18r  | 0.0162      | 1/second             |
| k17f  | 4.0352E-07  | cell/molecule/second |
| k17r  | 0.0134      | 1/second             |
| k301f | 1.66E-06    | cell/molecule/second |
| k301r | 5.00E-05    | 1/second             |

|       |          |                      |
|-------|----------|----------------------|
| k302f | 1.66E-06 | cell/molecule/second |
| k302r | 1.80E-04 | 1/second             |
| k303f | 4.04E-07 | cell/molecule/second |
| k303r | 0.67     | 1/second             |
| k304f | 7.02E-07 | cell/molecule/second |
| k304r | 0.81     | 1/second             |
| k305  | 0.35     | 1/second             |
| k308f | 4.04E-07 | cell/molecule/second |
| k308r | 0.67     | 1/second             |
| k309f | 7.02E-07 | cell/molecule/second |
| k309r | 0.81     | 1/second             |
| k310  | 0.29     | 1/second             |
| k306f | 0        | cell/molecule/second |
| k306r | 0        | 1/second             |
| k307  | 0        | 1/second             |
| k311f | 0        | cell/molecule/second |
| k311r | 0        | 1/second             |
| k312  | 0        | 1/second             |
