# Supplementary material for: Combined MEK and ERK inhibition overcomes therapy-mediated pathway reactivation in RAS mutant tumors
Source: PubMed Central journal article supplement (PMC5628883; doi:10.1371/journal.pone.0185862), 2017-10-05
Supplement: pone.0185862.s002.pdf [file pone.0185862.s002.pdf]

# Figure S1

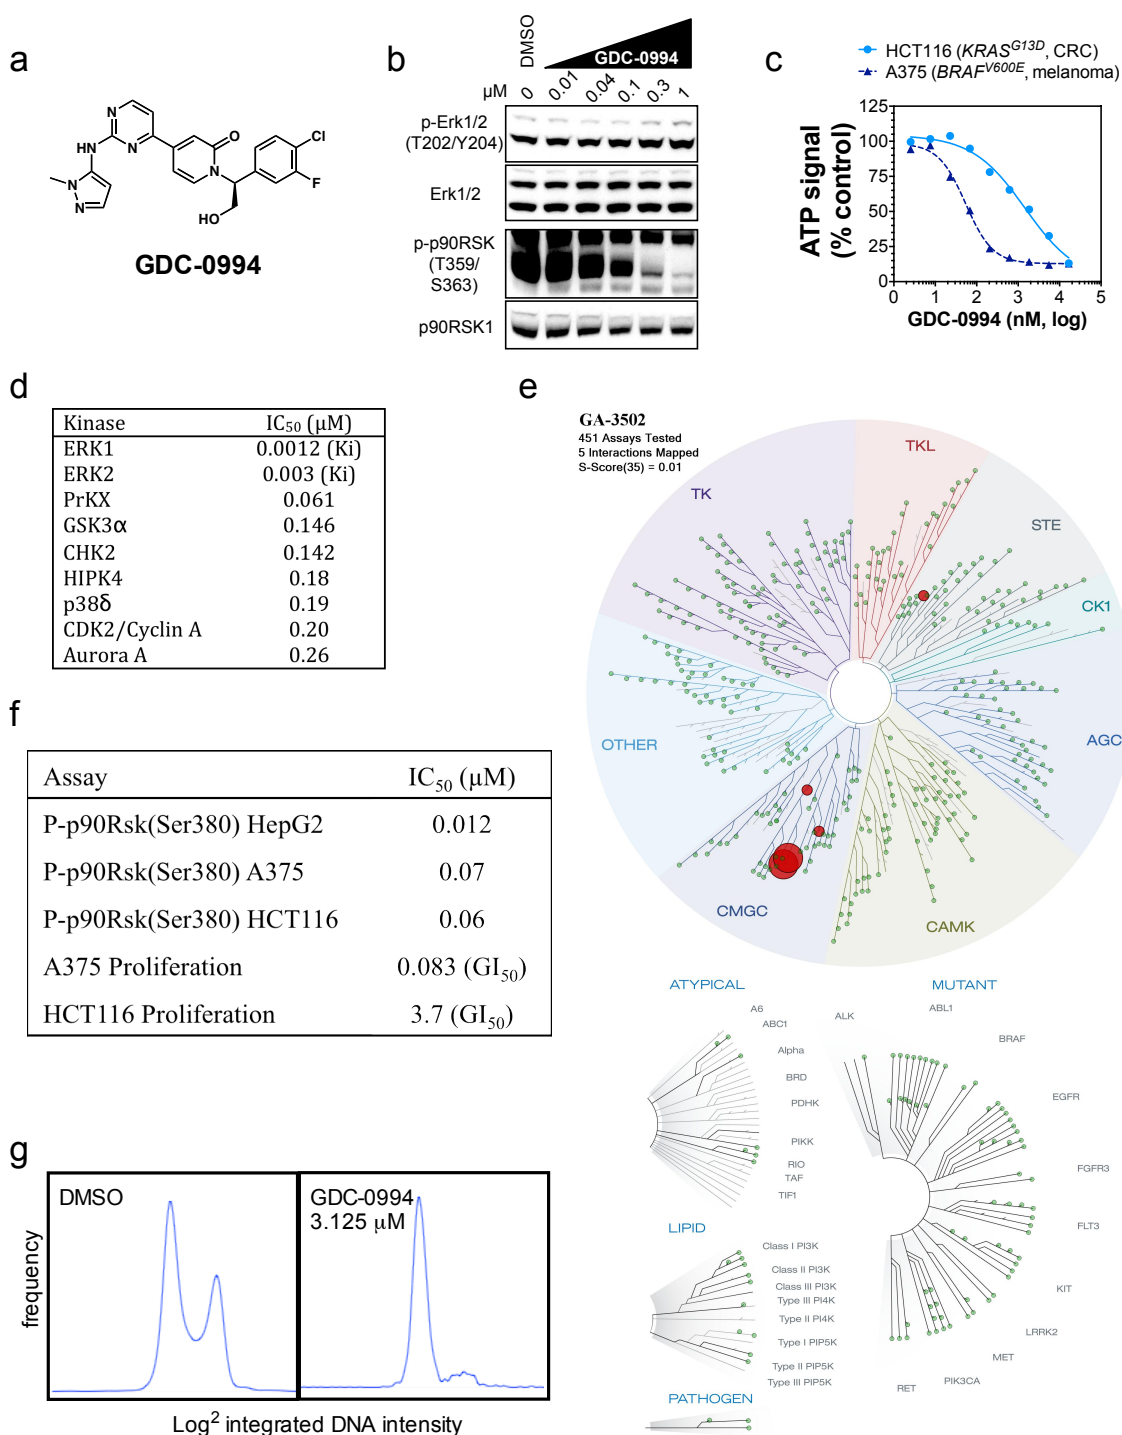

**Supplemental Figure 1. ERK inhibitor GDC-0994 molecule summary. (a)** Chemical structure of ERK1/2 inhibitor, GDC-0994. **(b)** GDC-0994 suppresses

ERK1/2 activity in HCT116 cells, demonstrating suppression of downstream phosphorylation of ERK1/2 substrate, p90RSK while not significantly altering pERK status (treatment 1 hr; concentrations between 0.01 – 1  $\mu$ M). (c) GDC-0994 demonstrates suppression of cell viability in both *RAS* and *BRAF* mutant cell lines in vitro. Exponentially growing cells in medium containing 10% Fetal Bovine Serum (FBS) were treated as indicated for 72 hours, then relative viability was measured using CellTiter-Glo® reagent. (d) Enzymatic activity ( $IC_{50}$  / $K_i$  values) of GDC-0994 against ERK1 and ERK2 and the next most inhibited kinases are listed. (e) Selectivity map of GDC-0994 vs. the kinome as determined using the DiscoverX scanMAX® assay panel ([www.discoverx.com](http://www.discoverx.com)). (f) GDC-0994 cellular  $IC_{50}$  values or inhibition of p90RSK and cellular proliferation in the indicated cell lines. (g) GDC-0994 treatment results in a G1 cell cycle arrest in HCT116 cells. Exponentially growing cells in medium containing 10% FBS were treated with 3.125  $\mu$ M GDC-0994 for 24 hours before paraformaldehyde fixation and staining with Hoechst 33342. DNA content was determined by measuring integrated Hoechst staining intensity for individual cells using Evotec Opera imaging system and Acapella image analysis software.
