# Supplementary material for: Combined MEK and ERK inhibition overcomes therapy-mediated pathway reactivation in RAS mutant tumors
Source: PubMed Central journal article supplement (PMC5628883; doi:10.1371/journal.pone.0185862), 2017-10-05
Supplement: pone.0185862.s004.pdf [file pone.0185862.s004.pdf]

# Figure S3

a

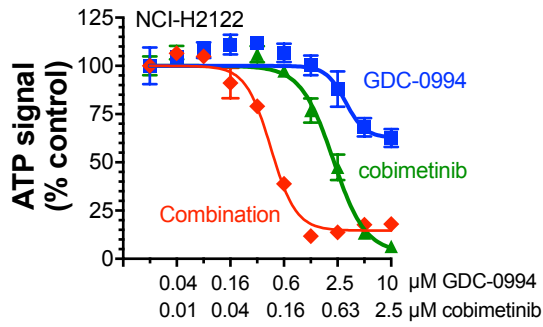

b

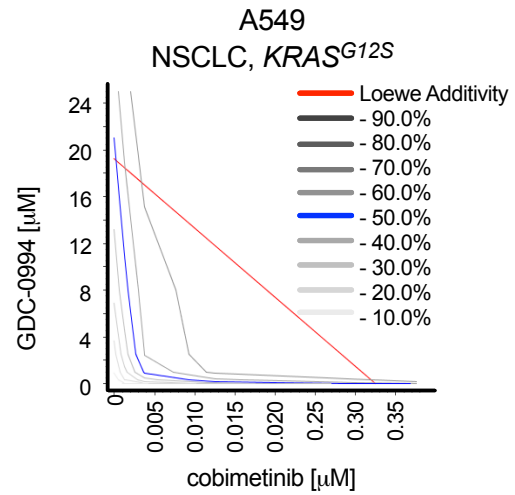

c

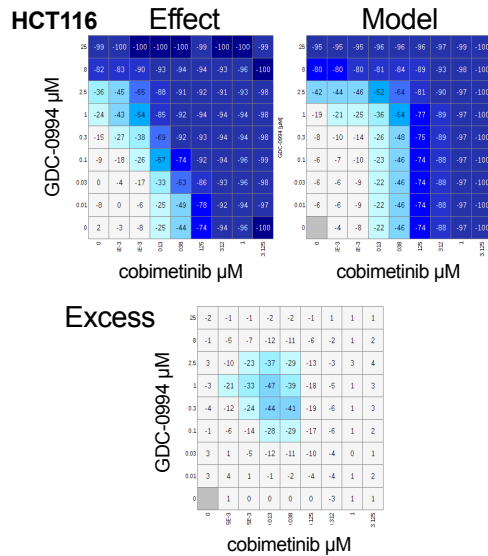

d

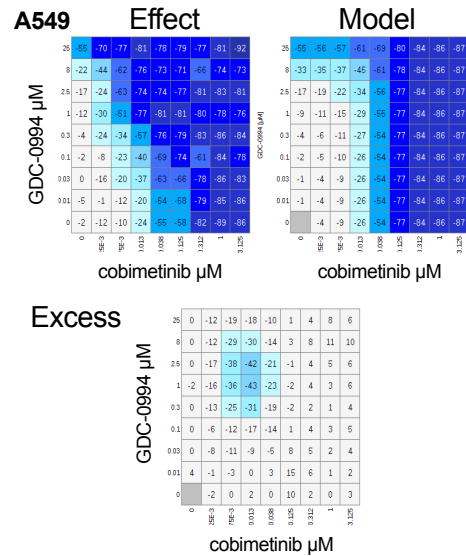

e

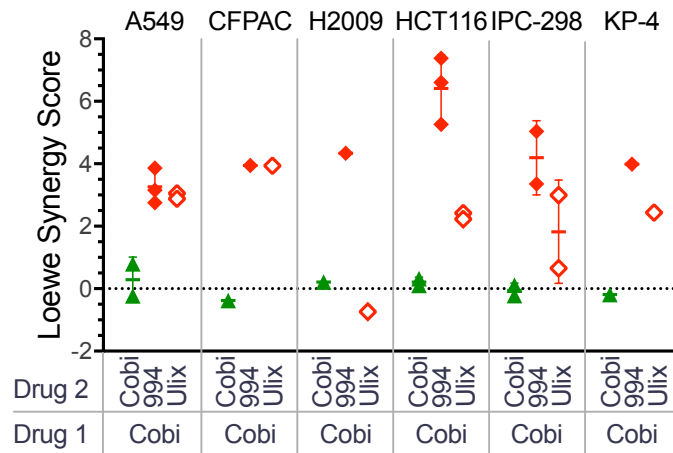

**Supplemental Figure 3. Dual node targeting is synergistic in *KRAS* mutant setting.**

(a) Cell viability in NCI-H2122 (*KRAS*<sup>G12C</sup>, NSCLC) cells were treated with cobimetinib and GDC-0994 at the indicated concentrations and cell viability was measured after 72 hr of culture (CellTiter-Glo®). (b) Isobologram analysis of EdU incorporation was utilized to evaluate the combination of cobimetinib and GDC-0994 in A549 (*KRAS*<sup>G12S</sup>, NSCLC) cells. Predicted Loewe additivity is shown in red, whereas fitting of the 50% effect values is plotted in blue. (c) Response data from the isobologram studies in HCT116 (*KRAS*<sup>G13D</sup>, colorectal) and (d) A549 with cobimetinib and GDC-0994 were used to plot the “Effect” vs. the assumed “Model” of additivity with the calculated “Excess” plotted below. (e) Synergistic antiproliferative effect of ERK inhibitors with cobimetinib on *RAS* mutant cell lines. Cells were treated with the indicated drug combinations where cobimetinib (Drug 1) was combined with either itself (Cobi, closed green triangles) or the ERK inhibitors GDC-0994 (994, filled red diamonds) or ulixertinib (BVD-523, Ulix, open red diamonds) (Drug 2) in a dose-matrix format. Cells were grown for 48 hours and the proliferative fraction was determined by EdU labeling using high-content imaging. Synergy was determined using the Loewe additivity model and summarized as a weighted average of excess activity over predicted additivity. Cobimetinib combined with itself in both arms of the matrix serves as sham control resulting in a score of zero. Individual symbols represent independent experiments with mean and SD indicated. Cell lines tested: A549 (NSCLC, *KRAS*<sup>G12C</sup>), CFPAC (pancreatic adenocarcinoma, *KRAS*<sup>G12V</sup>), H2009 (lung adenocarcinoma *KRAS*<sup>G12A</sup>), HCT116 (colon carcinoma, *KRAS*<sup>G13D</sup>), IPC-298 (melanoma, *NRAS*<sup>Q61L</sup>), KP-4 (pancreatic carcinoma, *KRAS*<sup>G12D</sup>).
