# Supplementary material for: Combined MEK and ERK inhibition overcomes therapy-mediated pathway reactivation in RAS mutant tumors
Source: PubMed Central journal article supplement (PMC5628883; doi:10.1371/journal.pone.0185862), 2017-10-05
Supplement: pone.0185862.s005.pdf [file pone.0185862.s005.pdf]

# Figure S4

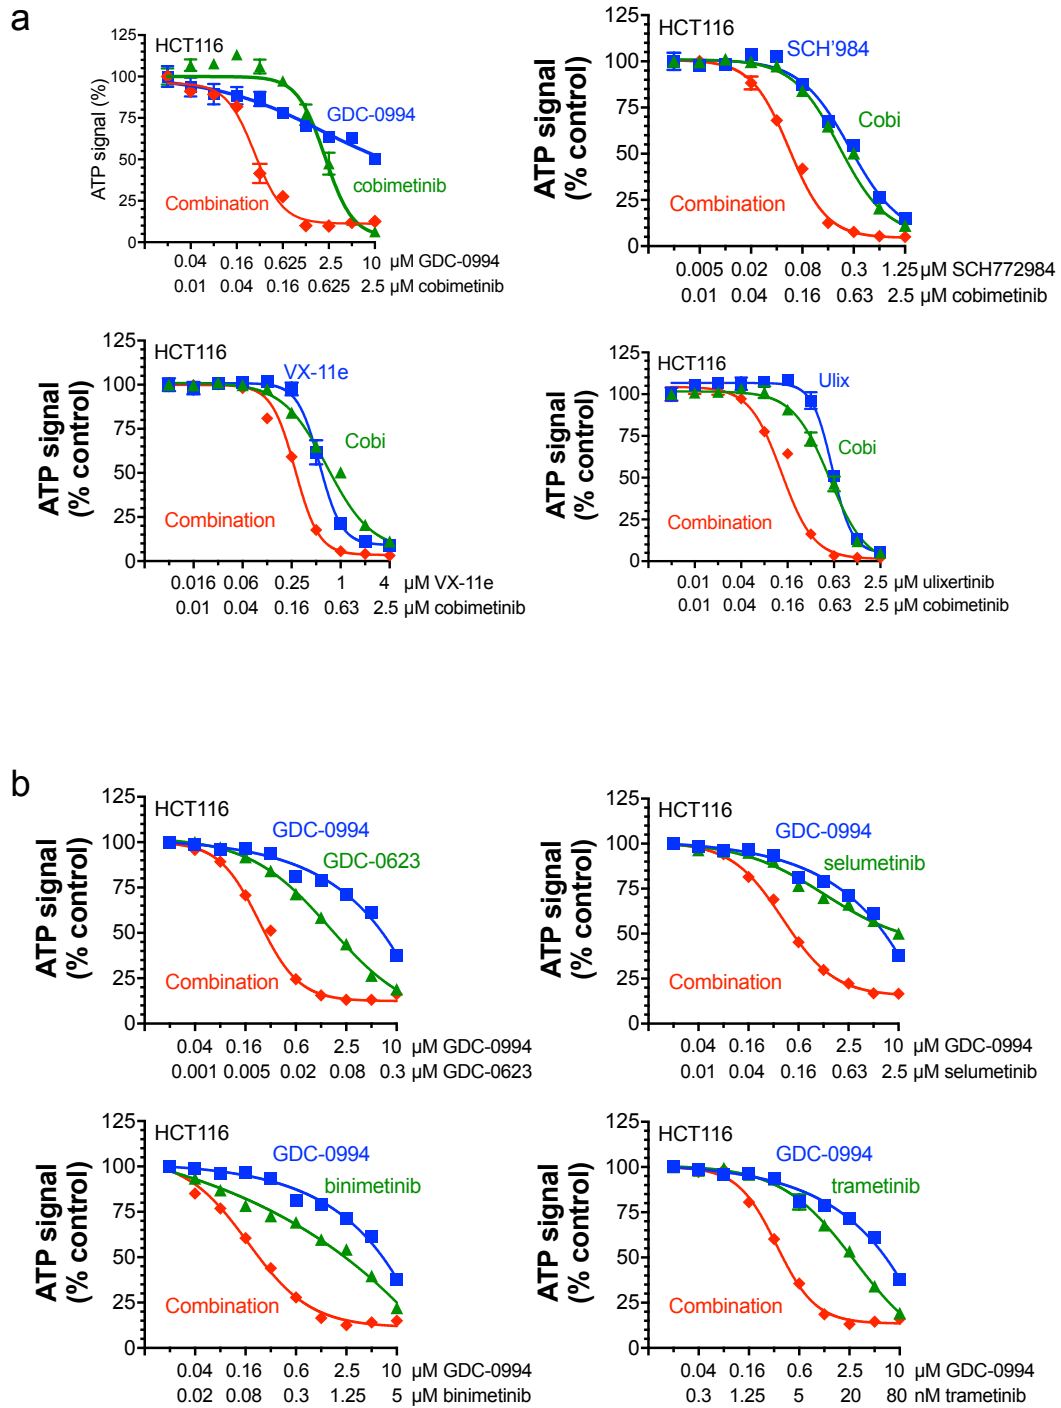

**Supplemental Figure 4. Combination of different MEK and ERK inhibitors results in combination anti-proliferative activity.**

(a) Cell viability in HCT116 ( $KRAS^{G13D}$ , colorectal) cells were treated with cobimetinib and four different ERK inhibitors, GDC-0994, SCH772984, Vx-11e, and ulixertinib (BVD-523) at the indicated concentrations and cell viability was measured after 72 hr of culture (CellTiter-Glo®). (b) Cell viability in HCT116 ( $KRAS^{G13D}$ , colorectal) cells were treated with GDC-0994 and four different MEK inhibitors, GDC-0623, selumetinib, binimetinib, and trametinib at the indicated concentrations and cell viability was measured after 72 hr of culture (CellTiter-Glo®). Studies were run concurrently with some curves represented more than once for ease of comparison.
