# Supplementary material for: Combined MEK and ERK inhibition overcomes therapy-mediated pathway reactivation in RAS mutant tumors
Source: PubMed Central journal article supplement (PMC5628883; doi:10.1371/journal.pone.0185862), 2017-10-05
Supplement: pone.0185862.s006.pdf [file pone.0185862.s006.pdf]

## Figure S5

a

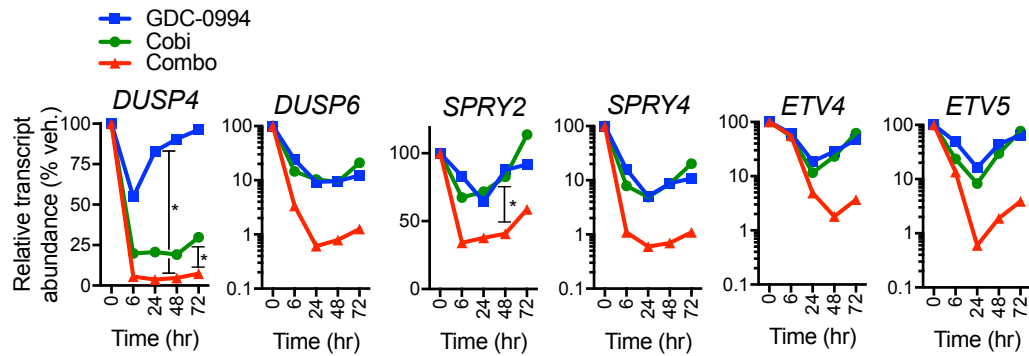

**Supplemental Figure 5. Dual node targeting leads to deeper target gene suppression and overcome reactivation of transcripts in *KRAS* mutant cell line.** Pathway reactivation at the level of MAPK target gene transcript in HCT116 cells using the EC<sub>50</sub> concentrations for single agents cobimetinib 0.25  $\mu$ M, GDC-0994 1.25  $\mu$ M compared to fractional dual node targeting with cobimetinib 0.125  $\mu$ M and GDC-0994 0.625  $\mu$ M at indicated time points. One-way ANOVA, \* p<0.05.
