# Supplementary material for: Combined MEK and ERK inhibition overcomes therapy-mediated pathway reactivation in RAS mutant tumors
Source: PubMed Central journal article supplement (PMC5628883; doi:10.1371/journal.pone.0185862), 2017-10-05
Supplement: pone.0185862.s008.pdf [file pone.0185862.s008.pdf]

**Figure S7**

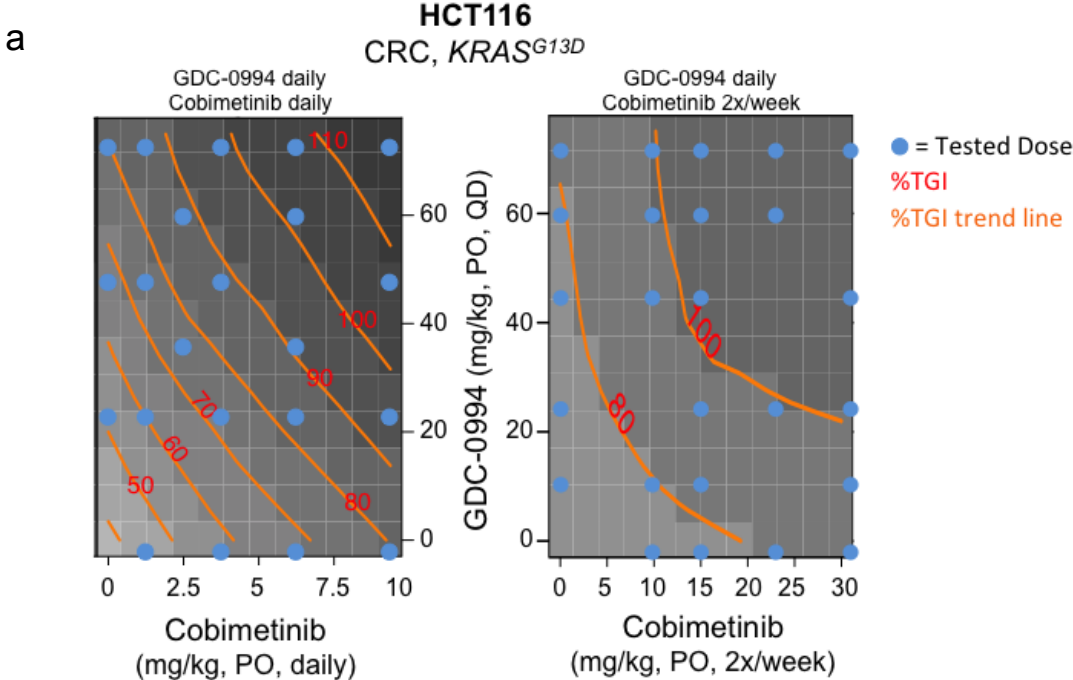

b

| %TGI             |     | GDC-0994 (mg/kg) |      |      |      |      |      |
|------------------|-----|------------------|------|------|------|------|------|
|                  |     | 0                | 25   | 37.5 | 50   | 62.5 | 75   |
| GDC-0973 (mg/kg) | 0   | 0                | 38   |      | 79   |      | 66   |
|                  | 1   | 48               | 57   |      | 73   |      | 74   |
|                  | 2   |                  |      | 81   |      | 93   |      |
|                  | 3   | 41               | 73   |      | 68   |      | 97*  |
|                  | 5   | 62               | 85   | 80   |      | 98*  | 112* |
|                  | 7.5 | 72               | 100* |      | 111* |      | 117* |

  

| %TGI             |      | GDC-0994 (mg/kg) |     |      |      |      |      |
|------------------|------|------------------|-----|------|------|------|------|
|                  |      | 0                | 15  | 30   | 45   | 60   | 75   |
| GDC-0973 (mg/kg) | 0    | 0                | 84  | 65   | 75   | 82   | 78   |
|                  | 7.5  | 44               | 79  |      | 102* |      | 97   |
|                  | 15   | 78               | 91  | 109* | 107* | 112* | 117* |
|                  | 22.5 | 75               |     | 111* |      | 118* |      |
|                  | 30   | 93               | 112 |      | 120* |      | 129* |

\* p<0.05  
All combinations were tolerated

\* p<0.05  
**Bold red** text >15% BW loss

**Supplemental Figure 7. Cobimetinib and GDC-0994 demonstrate dose-dependent combination activity when dosed on a daily or intermittent schedule in the HCT116 xenograft tumor model.** (a) HCT116 (*KRAS*<sup>G13D</sup>, colorectal) tumor xenograft bearing animals were dosed orally (PO) for 21 days with cobimetinib on a daily basis (QD, left panel) or a twice weekly schedule (BIW, right panel) in combination with GDC-0994 PO, QD at the indicated dose levels (blue circles, n=5/group) and %TGI was calculated relative to a vehicle control (n=10). Data were used to generate two-drug contour plots where observed %TGI was used to inform missing dose combinations (%TGI levels indicated in red and %TGI trend lines shown in yellow). Inward curved trend lines indicate greater than additive combination activity. (b) Summary data for the two-drug contour studies depicted above with measured %TGI at each dose combination. Dose combinations resulting in improved %TGI relative to each single agent are indicated (Student's t test, \* p<0.05). Dose combinations where combinations were considered intolerable are indicated in bold red.
