# Supplementary material for: Combined MEK and ERK inhibition overcomes therapy-mediated pathway reactivation in RAS mutant tumors
Source: PubMed Central journal article supplement (PMC5628883; doi:10.1371/journal.pone.0185862), 2017-10-05
Supplement: pone.0185862.s009.pdf [file pone.0185862.s009.pdf]

## Figure S8

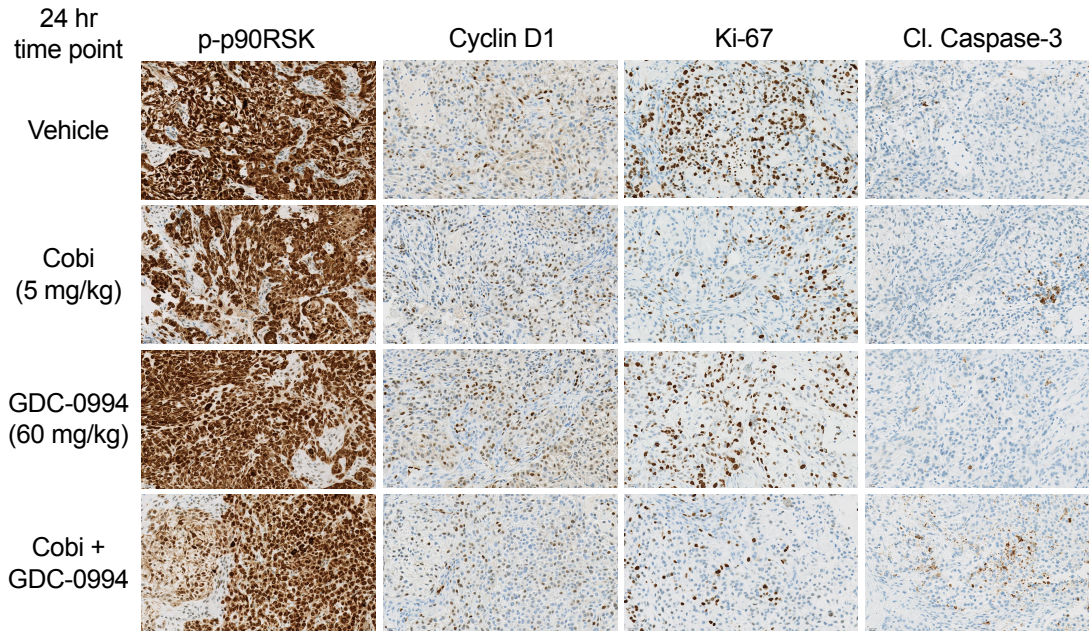

**Supplemental Figure 8. Immunohistochemistry (IHC) staining of p-p90RSK, cyclin D1, Ki-67 and cleaved caspase 3 from A549 xenografts treated with cobimetinib and GDC-0994.** A549 ( $KRAS^{G12S}$ , NSCLC) tumor xenograft bearing animals were dosed for 4 days with vehicle, cobimetinib (5 mg/kg, PO, QD), GDC-0994 (60 mg/kg, PO, QD) or the combination (n=4/time point) and IHC for cyclin D1, Ki-67 and cleaved caspase 3 was performed. Slides were scanned and signal was quantified. The figure shows an example of the staining obtained at the 24 hr time point.
