# Supplementary material for: Combined MEK and ERK inhibition overcomes therapy-mediated pathway reactivation in RAS mutant tumors
Source: PubMed Central journal article supplement (PMC5628883; doi:10.1371/journal.pone.0185862), 2017-10-05
Supplement: pone.0185862.s010.pdf [file pone.0185862.s010.pdf]

## Figure S9

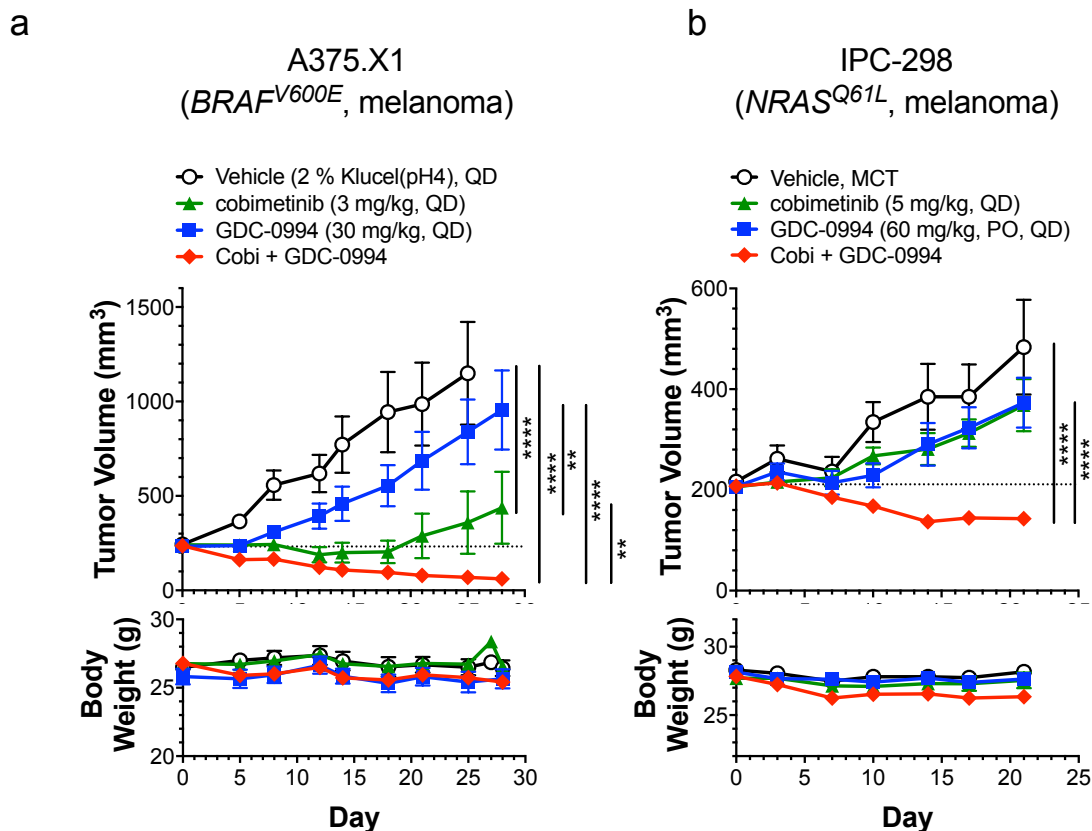

**Supplemental Figure 9. Combination activity of cobimetinib and GDC-0994 in a *BRAF* and *NRAS* mutant melanoma xenograft model.** (a) A375.X1 (*BRAF*<sup>V600E</sup>, melanoma) tumor xenograft bearing animals (n=10/group) were treated with vehicle, cobimetinib (3 mg/kg, PO, QD), GDC-0994 (30 mg/kg, PO, QD) or the combination for 21 days and tumor growth and body weights were measured. Group mean tumor volume and body weights are plotted  $\pm$  SEM. (b) IPC-298 (*NRAS*<sup>Q61L</sup>, melanoma) tumor xenograft bearing animals (n=10/group) were treated with vehicle, cobimetinib (5 mg/kg, PO, QD), GDC-0994 (60 mg/kg, PO, QD) or the combination for 21 days and tumor growth and body weights were measured. Group mean tumor volume and body weights are plotted  $\pm$  SEM. Groups achieving statistical significance are shown (Students t-test, \*\* p<0.005, \*\*\* p<0.001, \*\*\*\* p<0.0001).
